# Supplementary material for: Green and Sustainable Treatment of Urine Wastewater with a Membrane-Aerated Biofilm Reactor for Space Applications
Source: MDPI journal article supplement (doi:10.3390/w14223704), 2022-11-16
Supplement: s1 [file s1]

## **Material and Methods**

CTAB protocol for DNA extraction:

1. CTAB buffer was prepared with 2% cetyl trimethylammonium bromide (CTAB), 1% polyvinylpyrrolidone, 100 mM Tris-HCl, 1.4 M NaCl and 20 mM EDTA dissolved in double-distilled H<sub>2</sub>O (ddH<sub>2</sub>O).
2. 1000 µl of CTAB buffer was added to a 2 mL Eppendorf centrifuge tube, then 200 mg of the sludge sample and 0.5 mL of lysozyme buffer (10 mg/mL in water) was added. The mixture was thoroughly mixed by vortex and then kept at 65 °C water bath for 20 minutes.
3. The mixture was centrifuged at 12000 rpm for 10 min. The supernatant was collected and transferred to a new tube. 5 µl of RNase A solution (10 mg/ml in water, DNase-free) and incubate at 37°C for 20 minutes.
4. Then 800 µL of phenol/chloroform/isoamyl alcohol (volume ratio 25:24:1) solution was added. The mixture was mixed by vortex and then centrifuged at 12000 rpm for 10 min.
5. The aqueous phase was collected and transferred to a new tube, then equal volume of chloroform/isoamyl alcohol (volume ratio 24:1) was added. The mixture was mixed by vortex and then centrifuged at 12000 rpm for 10 min.
6. The aqueous phase was collected and transferred to a 1.5 mL tube, then 0.6 volume of isopropanol was added. The mixture was incubated at -20 °C for 30 min to precipitate the DNA.
7. The sample was centrifuged at 12000 rpm for 10 min. The supernatant was

carefully decanted without disturbing the precipitate.

8. The precipitate was washed with 1 mL 75% ethanol for two times.

9. The DNA was dried in clean bench by air to remove the ethanol without completely drying the DNA, otherwise the DNA would be hard to dissolve.

10. The DNA was dissolved with ddH<sub>2</sub>O. If necessary, the sample could be incubated at 55-60 °C to dissolve.

## Figures and Schemes

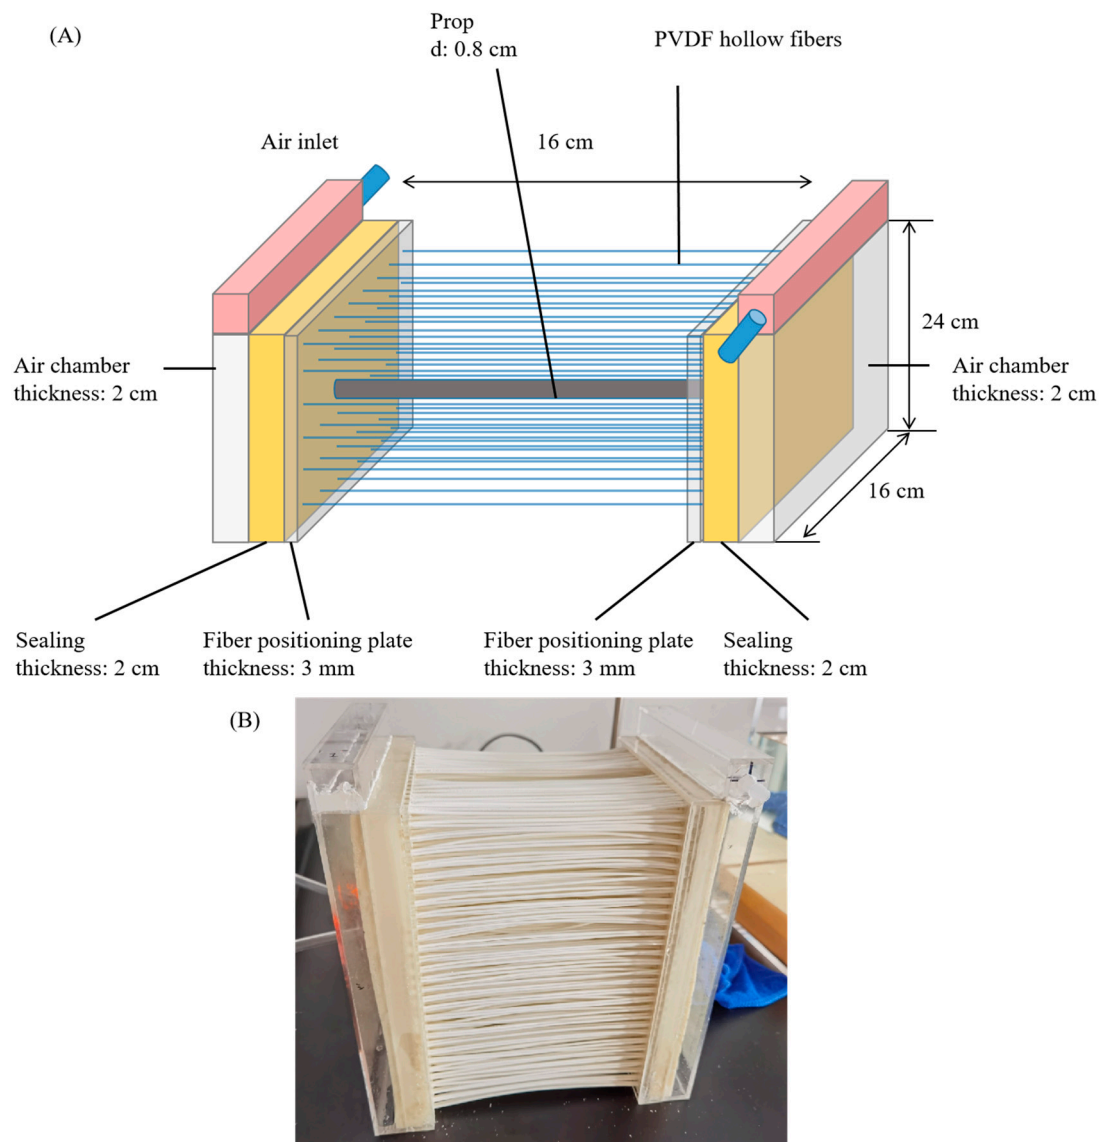

**Figure S1.** The configuration of the home-made MABR module (A) and its appearance before experiment (B). The module would float in water, so extra weight stacks were attached to the bottom to keep itself immersed during experiment.

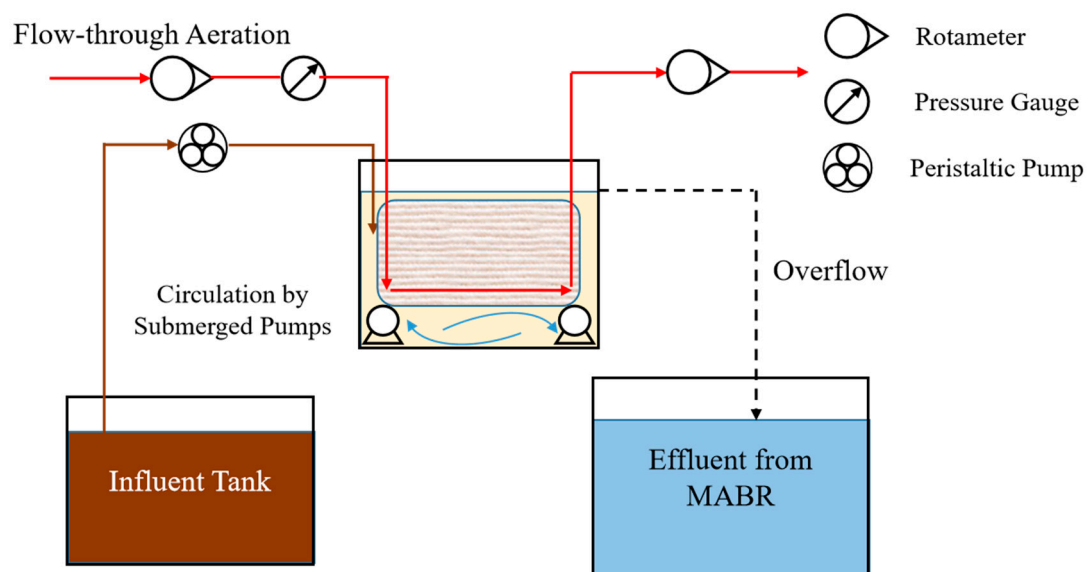

**Scheme S1.** The configuration of the membrane-aerated biofilm reactor (MABR) in this work.

A home-made MABR module was put inside the reactor, and on the reactor bottom was deployed two submerged pumps. The aeration was provided by an air pump, with the inlet and outlet air flow rate measured by rotameters and the aeration pressure measured by a pressure gauge. The influent was fed into the reactor by a peristaltic pump, and the effluent tank was put on a position lower than the reactor so the effluent could overflow by gravity.

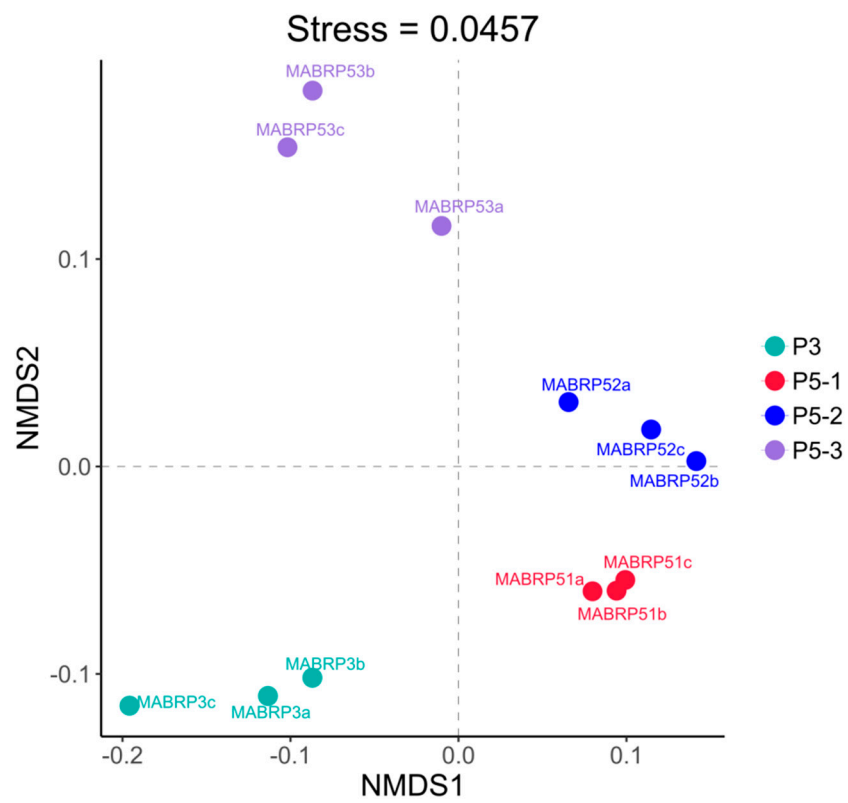

**Figure S2.** The NMDS plot for biofilm samples taken from P3, P5-1, P5-2 and P5-3.

## Tables

**Table S1.** Composition of nutrient media. The micronutrient components was prepared as a concentrated stock solution (columns on the right) and added to the nutrient media (columns on the left) as a single component.

| Nutrient media                                  |     |                                                     |      |
|-------------------------------------------------|-----|-----------------------------------------------------|------|
| Nutrient media (g/L)                            |     | Concentrated micronutrients (g/L)                   |      |
| (NH <sub>4</sub> ) <sub>2</sub> SO <sub>4</sub> | 0.5 | CaCl <sub>2</sub> ·2H <sub>2</sub> O                | 0.50 |
| NaHCO <sub>3</sub>                              | 1.0 | CoCl <sub>2</sub> ·6H <sub>2</sub> O                | 0.35 |
| KH <sub>2</sub> PO <sub>4</sub>                 | 1.0 | CuSO <sub>4</sub> ·5H <sub>2</sub> O                | 0.15 |
| glucose                                         | 0.2 | FeCl <sub>3</sub>                                   | 0.80 |
| Concentrated<br>micronutrients                  | 3   | MgSO <sub>4</sub> ·7H <sub>2</sub> O                | 0.34 |
|                                                 |     | MnCl <sub>2</sub> ·4H <sub>2</sub> O                | 0.50 |
|                                                 |     | Na <sub>2</sub> MoO <sub>4</sub> ·2H <sub>2</sub> O | 0.20 |
|                                                 |     | ZnSO <sub>4</sub> ·5H <sub>2</sub> O                | 0.55 |
|                                                 |     | Yeast powder                                        | 10   |

**Table S2.** The absolute abundance of nitrifying microorganisms detected in biofilm samples taken from BfR at P3, P5-1, P5-2 and P5-3. For each phase 3 parallel samples were taken.

| Genus                         | Denitrifying bacteria |       |       |        |        |        |
|-------------------------------|-----------------------|-------|-------|--------|--------|--------|
|                               | P3                    |       |       | P5-1   |        |        |
|                               | a                     | b     | c     | a      | b      | c      |
| <i>Acidovorax</i>             | 77086                 | 72324 | 69168 | 83287  | 94127  | 85466  |
| <i>Alicyclophilus</i>         | 42012                 | 40101 | 31153 | 114808 | 109042 | 109862 |
| <i>Thauera</i>                | 19086                 | 18972 | 12970 | 69662  | 84635  | 76030  |
| <i>Pseudomonas</i>            | 42493                 | 55882 | 43157 | 50850  | 46836  | 40409  |
| <i>Hydrogenophaga</i>         | 53478                 | 48429 | 34866 | 72384  | 75762  | 73988  |
| <i>Hyphomicrobium</i>         | 38581                 | 37327 | 29754 | 26745  | 20831  | 24685  |
| <i>Methyloversatilis</i>      | 11895                 | 13136 | 11042 | 3195   | 3025   | 3192   |
| <i>Burkholderia</i>           | 24079                 | 24074 | 16565 | 20145  | 19167  | 19759  |
| <i>Paracoccus</i>             | 11107                 | 10878 | 10017 | 19941  | 21529  | 20588  |
| <i>Ralstonia</i>              | 12516                 | 12812 | 8555  | 12791  | 12670  | 13228  |
| <i>Cupriavidus</i>            | 12412                 | 12169 | 8330  | 13717  | 13295  | 13051  |
| <i>Rubrivivax_gelatinosus</i> | 18254                 | 15358 | 10526 | 13129  | 12801  | 12377  |
| <i>Bradyrhizobium</i>         | 7600                  | 7693  | 7438  | 11121  | 10165  | 10127  |
| <i>Thermomonas</i>            | 4175                  | 3427  | 3294  | 1963   | 2094   | 2022   |
| <i>Rhizobium</i>              | 8308                  | 9645  | 6852  | 6778   | 6088   | 6426   |
| <i>Stenotrophomonas</i>       | 7270                  | 7034  | 5291  | 7021   | 7114   | 6709   |
| <i>Azoarcus</i>               | 4402                  | 4573  | 2975  | 8606   | 8938   | 8476   |
| <i>Achromobacter</i>          | 4358                  | 4068  | 2930  | 6492   | 6277   | 6257   |
| <i>Magnetospirillum</i>       | 853                   | 1000  | 747   | 2279   | 3006   | 2829   |
| <i>Bosea</i>                  | 3882                  | 4179  | 4527  | 5373   | 4386   | 4843   |
| <i>Brevundimonas</i>          | 9313                  | 11959 | 9546  | 3053   | 2348   | 2752   |
| <i>Aeromonas</i>              | 6518                  | 6371  | 6800  | 3500   | 4011   | 3737   |
| <i>Caulobacter</i>            | 803                   | 798   | 813   | 683    | 924    | 775    |
| <i>Rhodopseudomonas</i>       | 2657                  | 2783  | 2782  | 4374   | 4137   | 4216   |
| <i>Sulfuritalea</i>           | 2193                  | 2430  | 1683  | 4067   | 3923   | 4005   |
| <i>Aquamicrobium</i>          | 1027                  | 1247  | 3452  | 1928   | 1836   | 1824   |
| <i>Dechloromonas</i>          | 1835                  | 1959  | 1455  | 2378   | 2336   | 2303   |
| <i>Thiobacillus</i>           | 1642                  | 1924  | 1187  | 2316   | 2228   | 2245   |
| <i>Arenimonas</i>             | 1125                  | 1022  | 973   | 1653   | 1695   | 1588   |
| <i>Alcaligenes</i>            | 317                   | 351   | 397   | 1355   | 1580   | 1564   |
| <i>Methylobacillus</i>        | 109                   | 126   | 105   | 198    | 152    | 163    |
| <i>Methylothera</i>           | 15                    | 31    | 13    | 30     | 34     | 37     |
| <i>Methylophilus</i>          | 17                    | 17    | 5     | 0      | 15     | 0      |

### Denitrifying bacteria (continued)

| Genus                         | P5-2  |        |        | P5-3  |       |       |
|-------------------------------|-------|--------|--------|-------|-------|-------|
|                               | a     | b      | c      | a     | b     | c     |
| <i>Acidovorax</i>             | 83583 | 76906  | 80474  | 84133 | 82181 | 81789 |
| <i>Alicyclophilus</i>         | 68088 | 69136  | 70978  | 76325 | 68344 | 70714 |
| <i>Thauera</i>                | 84771 | 69926  | 81040  | 46103 | 53858 | 49494 |
| <i>Pseudomonas</i>            | 54235 | 147929 | 101788 | 63255 | 60123 | 57281 |
| <i>Hydrogenophaga</i>         | 33668 | 26142  | 30343  | 14839 | 12485 | 13135 |
| <i>Hyphomicrobium</i>         | 24955 | 24115  | 25282  | 37844 | 44581 | 41187 |
| <i>Methyloversatilis</i>      | 3851  | 4141   | 3822   | 66422 | 76182 | 71334 |
| <i>Burkholderia</i>           | 24678 | 27044  | 24920  | 20724 | 16951 | 18555 |
| <i>Paracoccus</i>             | 18667 | 14614  | 17373  | 19652 | 24815 | 22641 |
| <i>Ralstonia</i>              | 16527 | 17788  | 17158  | 18216 | 16546 | 17298 |
| <i>Cupriavidus</i>            | 16352 | 18160  | 17297  | 13660 | 11715 | 12405 |
| <i>Rubrivivax_gelatinosus</i> | 14146 | 16817  | 14417  | 9174  | 7563  | 8267  |
| <i>Bradyrhizobium</i>         | 13774 | 11996  | 13064  | 13439 | 16265 | 15321 |
| <i>Thermomonas</i>            | 3580  | 2488   | 3020   | 23699 | 31905 | 26867 |
| <i>Rhizobium</i>              | 9214  | 7973   | 8999   | 8430  | 9765  | 9191  |
| <i>Stenotrophomonas</i>       | 7776  | 8555   | 8577   | 10263 | 10020 | 10395 |
| <i>Azoarcus</i>               | 9584  | 11026  | 10179  | 5200  | 4165  | 4557  |
| <i>Achromobacter</i>          | 7784  | 8066   | 7839   | 5482  | 4313  | 4749  |
| <i>Magnetospirillum</i>       | 10511 | 24202  | 16576  | 2245  | 1505  | 1120  |
| <i>Bosea</i>                  | 5650  | 4305   | 4968   | 6369  | 8394  | 7135  |
| <i>Brevundimonas</i>          | 2246  | 3277   | 2571   | 3922  | 3627  | 3752  |
| <i>Aeromonas</i>              | 3725  | 4055   | 4312   | 4986  | 5139  | 4747  |
| <i>Caulobacter</i>            | 903   | 592    | 754    | 1011  | 963   | 999   |
| <i>Rhodopseudomonas</i>       | 5683  | 4939   | 5470   | 5926  | 7003  | 6456  |
| <i>Sulfuritalea</i>           | 5810  | 6099   | 6255   | 2527  | 1451  | 1968  |
| <i>Aquamicrobium</i>          | 3322  | 2401   | 2764   | 3618  | 4300  | 3820  |
| <i>Dechloromonas</i>          | 3188  | 3257   | 3063   | 1561  | 1262  | 1533  |
| <i>Thiobacillus</i>           | 3161  | 3215   | 3137   | 1398  | 1021  | 1274  |
| <i>Arenimonas</i>             | 1716  | 1669   | 1600   | 1217  | 1139  | 1259  |
| <i>Alcaligenes</i>            | 561   | 485    | 492    | 514   | 462   | 533   |
| <i>Methylobacillus</i>        | 324   | 241    | 282    | 247   | 167   | 258   |
| <i>Methylothera</i>           | 61    | 65     | 69     | 25    | 22    | 23    |
| <i>Methylophilus</i>          | 22    | 25     | 25     | 32    | 18    | 26    |



**Nitrifying bacteria & Anammox bacteria**

| Genus                      | P3   |       |       | P5-1 |      |      |
|----------------------------|------|-------|-------|------|------|------|
|                            | a    | b     | c     | a    | b    | c    |
| <i>Candidatus Kuenenia</i> | 487  | 497   | 444   | 992  | 614  | 969  |
| <i>Nitrolancea</i>         | 0    | 0     | 0     | 7    | 11   | 14   |
| <i>Nitrospira</i>          | 1014 | 1626  | 993   | 175  | 231  | 218  |
| <i>Nitrobacter</i>         | 499  | 540   | 1277  | 833  | 729  | 790  |
| <i>Nitrococcus</i>         | 31   | 19    | 9     | 25   | 18   | 26   |
| <i>Nitrosomonas</i>        | 6473 | 11924 | 18220 | 2078 | 2247 | 2365 |
| <i>Nitrosospira</i>        | 211  | 223   | 136   | 241  | 173  | 256  |
| <i>Nitrosovibrio</i>       | 14   | 18    | 7     | 0    | 14   | 0    |
| <i>Nitrosococcus</i>       | 20   | 22    | 23    | 34   | 19   | 38   |

**Nitrifying bacteria & Anammox bacteria (continued)**

| Genus                      | P5-2 |      |      | P5-3  |       |       |
|----------------------------|------|------|------|-------|-------|-------|
|                            | a    | b    | c    | a     | b     | c     |
| <i>Candidatus Kuenenia</i> | 4364 | 4503 | 5631 | 1785  | 991   | 1503  |
| <i>Nitrolancea</i>         | 44   | 47   | 45   | 49    | 49    | 40    |
| <i>Nitrospira</i>          | 322  | 318  | 307  | 352   | 347   | 365   |
| <i>Nitrobacter</i>         | 1132 | 979  | 1055 | 1141  | 1423  | 1362  |
| <i>Nitrococcus</i>         | 30   | 16   | 26   | 20    | 11    | 25    |
| <i>Nitrosomonas</i>        | 5421 | 3423 | 5780 | 21925 | 22648 | 24953 |
| <i>Nitrosospira</i>        | 303  | 298  | 296  | 245   | 215   | 190   |
| <i>Nitrosovibrio</i>       | 23   | 0    | 29   | 51    | 50    | 29    |
| <i>Nitrosococcus</i>       | 49   | 48   | 56   | 20    | 19    | 40    |

**Table S3.** The reads of functional genes involved in nitrification and denitrification pathways detected in biofilm samples taken from MABR at P3, P5-1, P5-2 and P5-3. For each phase 3 parallel samples were taken.

| Functional genes                              | P3      |         |         | P5-1    |         |         |
|-----------------------------------------------|---------|---------|---------|---------|---------|---------|
|                                               | a       | b       | c       | a       | b       | c       |
| K10944: <i>amoA</i><br>EC 1.14.99.39          | 29.338  | 36.242  | 87.618  | 5.062   | 10.794  | 3.503   |
| K10945: <i>amoB</i><br>EC 1.14.99.39          | 46.87   | 81.271  | 100.87  | 13.878  | 13.36   | 10.237  |
| K10946: <i>amoC</i><br>EC 1.14.99.39          | 73.115  | 102.971 | 195.376 | 20.68   | 6.128   | 8.436   |
| K10535: <i>hao</i><br>EC:1.7.2.6              | 97.199  | 175.028 | 176.941 | 102.547 | 79.045  | 96.817  |
| K00370:<br><i>narG/nxrA</i><br>EC:1.7.5.1     | 281.778 | 249.063 | 193.132 | 424.088 | 381.914 | 423.432 |
| K00371:<br><i>narH/ nxrB</i><br>EC:1.7.5.1    | 572.008 | 514.124 | 489.311 | 995.614 | 992.772 | 1034.4  |
| K00374: <i>narI</i><br>EC:1.7.5.1             | 39.525  | 37.002  | 46.011  | 336.843 | 278.626 | 274.305 |
| K02567: <i>napA</i><br>EC:1.9.6.1             | 57.336  | 62.404  | 38.174  | 74.67   | 62.371  | 52.525  |
| K02568: <i>napB</i><br>EC:1.9.6.1             | 0       | 0       | 0       | 0       | 2.499   | 0       |
| K00368: <i>nirK</i><br>EC:1.7.2.1             | 36.755  | 60.225  | 79.509  | 0       | 1.091   | 4.929   |
| K15864: <i>nirS</i><br>EC:1.7.2.1<br>1.7.99.1 | 252.312 | 189.04  | 154.384 | 222.286 | 215.391 | 244.43  |
| K04561: <i>norB</i><br>EC:1.7.2.5             | 52.548  | 52.775  | 97.173  | 52.818  | 75.277  | 84.375  |
| K02305: <i>norC</i><br>EC:1.7.2.5             | 39.126  | 36.676  | 71.515  | 23.844  | 35.34   | 28.686  |
| K00376: <i>nosZ</i><br>EC:1.7.2.4             | 215.433 | 226.45  | 239.572 | 446.488 | 465.739 | 501.03  |
| K20933: <i>hzs</i><br>EC:1.7.2.7              | 36.679  | 25.817  | 30.61   | 85.205  | 53.526  | 88.856  |
| K20935: <i>hdh</i><br>EC:1.7.2.8              | 20.367  | 19.241  | 17.254  | 53.721  | 33.338  | 47.836  |

**Table S3 (continued)**

| Functional genes                              | P5-2     |          |          | P5-3    |         |         |
|-----------------------------------------------|----------|----------|----------|---------|---------|---------|
|                                               | a        | b        | c        | a       | b       | c       |
| K10944: <i>amoA</i><br>EC 1.14.99.39          | 28.148   | 10.727   | 14.411   | 130.996 | 160.61  | 174.603 |
| K10945: <i>amoB</i><br>EC 1.14.99.39          | 42.259   | 27.772   | 33.498   | 213.424 | 290.186 | 256.651 |
| K10946: <i>amoC</i><br>EC 1.14.99.39          | 53.63    | 22.735   | 56.656   | 325.693 | 415.916 | 419.706 |
| K10535: <i>hao</i><br>EC:1.7.2.6              | 525.042  | 489.434  | 613.684  | 540.308 | 469.583 | 537.983 |
| K00370:<br><i>narG/nxrA</i><br>EC:1.7.5.1     | 557.151  | 646.787  | 645.135  | 305.2   | 228.207 | 247.038 |
| K00371:<br><i>narH/ nxrB</i><br>EC:1.7.5.1    | 1109.657 | 1040.166 | 1044.685 | 624.382 | 609.631 | 615.782 |
| K00374: <i>narI</i><br>EC:1.7.5.1             | 85.903   | 60.215   | 27.925   | 36.008  | 72.294  | 40.599  |
| K02567: <i>napA</i><br>EC:1.9.6.1             | 98.271   | 98.69    | 111.471  | 58.203  | 39.327  | 11.45   |
| K02568: <i>napB</i><br>EC:1.9.6.1             | 7.728    | 12.935   | 13.469   | 0       | 14.029  | 14.306  |
| K00368: <i>nirK</i><br>EC:1.7.2.1             | 15.873   | 3.975    | 0        | 61.14   | 77.765  | 81.362  |
| K15864: <i>nirS</i><br>EC:1.7.2.1<br>1.7.99.1 | 155.019  | 162.382  | 165.636  | 140.349 | 139.751 | 115.61  |
| K04561: <i>norB</i><br>EC:1.7.2.5             | 39.349   | 26.071   | 41.949   | 84.01   | 116.752 | 116.545 |
| K02305: <i>norC</i><br>EC:1.7.2.5             | 42.256   | 26.555   | 37.243   | 107.174 | 131.076 | 172.669 |
| K00376: <i>nosZ</i><br>EC:1.7.2.4             | 522.381  | 532.262  | 592.821  | 274.124 | 182.876 | 211.353 |
| K20933: <i>hzs</i><br>EC:1.7.2.7              | 315.535  | 353.28   | 380.022  | 115.378 | 67.05   | 81.651  |
| K20935: <i>hdh</i><br>EC:1.7.2.8              | 205.113  | 214.087  | 244.823  | 74.538  | 40.35   | 58.27   |
